# Supplementary material
Source: PubMed Central journal article supplement (PMC4800867)
Supplement: JB.00954-15_zjb999093980so1.pdf [file JB.00954-15_zjb999093980so1.pdf]

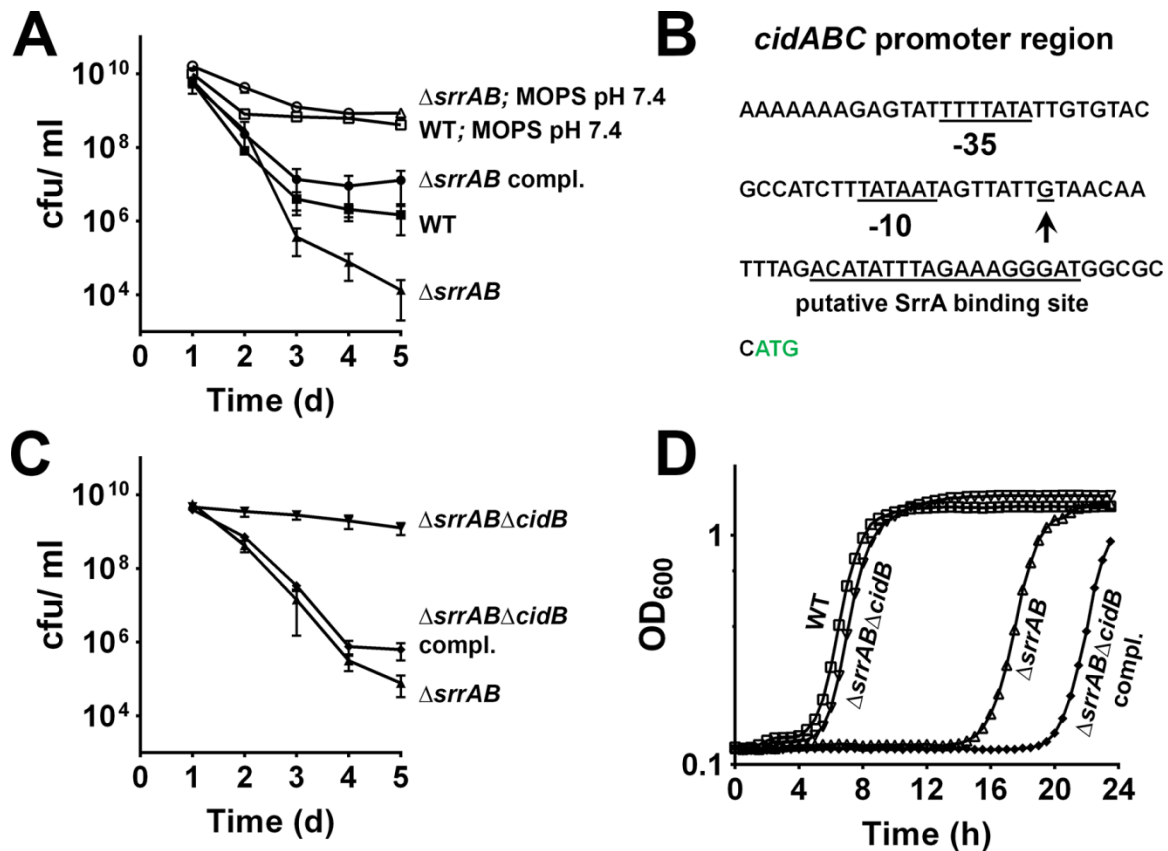

**Fig S1. Complementation of CidB phenotypes.** **A.** Stationary phase viabilities were monitored for cultures following growth in TSB-35 mM glucose over a period of 5 days. **B.** Sequence of the *cidABC* promoter. -35 and -10 are underlined. Transcription and translation start sites are denoted by an arrow and asterisk, respectively. The putative SrrA binding site is underlined and in bold. **C.** Stationary phase viabilities were monitored for cultures following growth in TSB-35 mM glucose over a period of 5 days. **D.** Cultures were challenged with 5 mM H<sub>2</sub>O<sub>2</sub> and growth was monitored for 24 hours at 37°C in a Tecan infinite 200 spectrophotometer under maximum aeration.
